# Supplementary material for: Promoting axon regeneration by inhibiting RNA N6-methyladenosine demethylase ALKBH5
Source: eLife. 2023 Aug 3;12:e85309. doi: 10.7554/eLife.85309 (PMC10400074; doi:10.7554/eLife.85309)
Supplement: Figure 1—source data 1. [file elife-85309-fig1-data1.xlsx]

## Sheet: Figure 1B
	0d			3d
Mettl3	0.123767	0.128723	0.069978	0.107697	0.129219	0.062944
Mettl14	5.97e-05	2.17e-05	4.18e-05	2.39e-05	3.03617e-05	8.75e-05
Wtap	0.023082	0.0207	0.022062	0.016877	0.016296	0.026401
Fto	0.05534	0.042859	0.024265	0.032324	0.026002	0.02558
Alkbh5	0.026324	0.024335	0.013387	0.020786	0.017894	0.018368
Ythdc1	0.03825	0.06232	0.026601	0.03791	0.039741	0.030815
Ythdc2	0.000221	0.000142009	0.000144	0.000133	8.69542e-05	0.000165
Ythdf1	0.050777	0.016368	0.025637	0.03901	0.0124361	0.022437
Ythdf2	0.038075	0.02621	0.02623	0.042902	0.022743	0.026997
Ythdf3	0.039956	0.037344	0.048033	0.055753	0.043966	0.065933
Igf2bp1	0.00023	5.71e-05	7.93e-05	0.000124	4.69603e-05	7.53e-05
Igf2bp2	0.000552	0.000352	0.000913	0.000292	0.000560366	0.00129
Igf2bp3	0.000314	6.93e-05	5.8e-05	1.62e-05	5.47698e-05	6.83e-05

## Sheet: Figure 1D
siControl	siMettl3-1	siMettl3-2	siWtap-1	siWtap-2	siFto-1	siFto-2	siAlkbh5-1	siAlkbh5-2	siYthdc1-1	siYthdc1-2	siYthdf1-1	siYthdf1-2	siYthdf2-1	siYthdf2-2	siYthdf3-1	siYthdf3-2
315.897	483.777	319.017	96.6731	36.5431	232.283	172.679	235.359	283.856	284.84	451.6	104.8	207.892	175.458	168.079	772.566	971.819
173.293	429.099	72.6714	225.162	202.694	243.89	167.772	267.116	251.025	288.111	135.099	213.155	295.403	224.733	308.353	225.231	166.53
66.8085	195.852	245.799	50.9652	90.597	420.89	170.105	401.327	245.735	120.625	183.999	191.927	134.929	425.439	304.739	415.762	258.95
741.87	492.557	65.8569	39.8698	182.028	255.133	515.462	321.204	278.997	186.132	596.581	519.601	93.9577	136.136	180.618	186.11	341.368
100.144	93.8059	171.569	236.323	114.337	385.95	218.548	84.731	405.566	96.5632	281.049	490.508	128.906	191.416	153.443	155.3	512.476
270.103	156.781	388.093	93.3331	50.4742	855.003	241.9	256.048	513.354	291.065	654.18	316.738	108.514	586.328	116.458	271.658	122.329
285.116	443.635	62.8715	120.237	173.125	455.475	273.226	275.664	238.877	195.262	158.238	167.397	200.998	165.873	363.113	312.434	93.0191
53.813	331.334	77.5211	64.7399	79.9415	171.195	148.107	140.557	156.42	146.687	126.804	169.682	76.4347	74.8952	57.6575	227.624	280.132
329.113	120.725	73.0921	117.524	86.7984	451.74	254.422	163.351	231.066	566.984	250.287	261.259	277.781	160.009	143.012	136.954	612.07
210.691	264.842	271.055	164.666	79.4104	475.251	269.32	422.164	110.754	270.2	571.553	129.463	248.194	126.916	168.965	203.576	126.437
160.848	101.687	76.9747	194.136	382.917	298.912	243.35	68.2812	367.825	211.228	397.858	180.159	418.234	86.9562	121.495	257.047	135.359
734.202	761.572	124.924	277.853	236.454	175.754	120.031	99.2118	238.001	199.756	989.223	312.483	378.013	189.768	90.9465	152.048	87.0194
240.048	93.4003	77.412	142.727	177.674	210.336	405.475	815.492	54.1687	213.692	697.89	277.079	250.546	225.01	354.035	289.902	503.247
368.939	262.029	449.827	234.542	320.989	239.764	304.593	225.101	116.498	656.123	649.206	257.325	88.3159	95.8048	462.495	343.096	313.922
361.163	352.608	194.953	147.223	49.2191	305.912	99.7467	369.676	202.875	103.693	240.429	246.31	191.626	171.035	358.198	181.759	416.105
528.519	432.125	63.9818	84.2928	108.374	486.391	216.454	124.181	81.1083	213.472	542.598	445.033	386.228	82.1248	340.818	140.799	269.926
292.494	391.318	188.76	74.69	73.8044	216.423	599.251	211.144	319.731	277.344	680.475	299.872	107.506	388.216	97.2448	330.107	153.806
332.421	169.808	65.4301	92.6496	95.7504	693.927	194.271	360.909	611.678	187.08	174.459	107.508	86.9246	185.901	182.591	431.221	101.337
418.754	213.791	76.7104	332.269	38.449	97.6612	571.949	119.343	262.011	269.972	207.696	136.181	316.742	163.11	213.654	421.916	110.938
112.023	80.3295	98.9226	149.096	37.4114	250.513	293.801	121.239	285.667	182.868	798.964	118.634	236.47	694.674	74.3263	622.234	507.371
230.879	501.602	357.274	234.094	90.2046	375.065	640.293	368.099	336.95	157.647	746.264	371.616	256.362	251.312	147.509	355.044	144.097
220.069	577.536	56.5194	121.106	28.0107	102.3	475.467	863.25	104.718	197.355	235.091	484.626	223.667	130.002	291.627	202.279	169.651
216.199	536.438	82.0536	141.651	236.844	339.902	88.7964	202.782	286.052	398.873	104.508	619.715	296.998	315.491	185.443	691.8	71.8497
325.889	534.141	46.7908	38.2806	143.009	180.449	232.61	156.097	257.084	96.4712	158.625	170.422	93.6612	188.124	60.1201	243.935	282.746
175.873	194.706	357.887	38.2806	239.02	494.851	424.539	201.558	230.508	226.746	121.293	94.5406	196.628	187.362	231.837	90.198	250.481
383.799	182.042	71.9326	38.2806	82.5679	378.291	272.374	214.253	330.231	231.912	310.722	116.25	282.188	155.916	64.6309	94.9855	137.979
542.231	342.339	273.559	62.3498	187.732	378.696	110.936	269.331	130.346	149.783	516.91	206.966	189.884	678.565	104.159	920.802	213.2
233.314	557.818	97.5731	480.622	79.4208	102.895	775.144	166.786	147.632	340.195	111.973	186.346	146.686	157.323	134.203	1006.32	144.659
318.326	441.243	71.6351	117.402	92.0276	342.244	133	148.448	260.613	230.978	155.479	202.924	312.187	151.736	134.274	118.796	123.638
324.599	497.779	274.499	166.05	83.8602	300.8	133.138	121.612	195.955	295.068	98.5444	264.991	223.635	764.764	181.457	821.383	123.84
142.724	156.503	66.4347	79.1341	57.2289	280.237	108.246	316.048	927.119	74.8952	228.61	728.754	123.33	136.175	434.065	301.654	171.071
256.66	99.2107	137.909	276.699	163.454	182.528	361.265	158.202	404.119	181.813	100.31	211.107	72.3803	311.075	104.421	249.155	423.403
948.425	256.828	496.065	105.926	73.7981	62.4736	668.266	339.7	361.593	185.908	251.454	78.0035	399.311	968.481	143.559	193.343	245.346
494.212	321.717	62.0239	329.548	126.616	347.13	169.276	295.026	122.082	152.016	271.537	322.136	404.306	283.964	83.3663	208.216	118.581
174.391	202.88	104.407	151.002	98.8655	127.268	93.5167	347.039	228.655	100.542	484.309	567.903	200.477	665.614	177.87	183.416	511.518
256.744	536.148	261.838	217.281	81.3286	185.088	197.561	82.4721	434.989	193.137	190.542	202.663	850.599	708.534	334.791	613.172	107.758
393.464	219.39	89.0125	61.5275	67.7228	137.471	570.432	201.215	158.636	400.539	235.196	88.1753	131.755	266.09	186.755	337.821	91.5687
99.3027	261.451	57.4627	114.774	287.721	108.99	159.372	96.2189	264.528	472.296	303.028	139.107	141.172	77.1048	696.647	340.365	304.719
100.773	397.007	116.302	44.9258	277.367	48.5135	72.4377	339.18	342.692	284.84	88.1279	640.879	533.44	273.972	90.2231	340.365	454.588
185.885	253.173	159.295	92.2852	61.2884	68.8278	114.216	449.687	179.565	288.111	267.698	387.399	120.653	112.71	211.683	460.944	172.574
191.679	177.035	108.678	87.3261	63.7176	200.849	123.681	410.937	246.662	120.625	432.392	132.981	244.684	197.634	414.147	106.273	63.3272
233.697	72.5506	146.208	358.711	190.449	175.271	69.8977	845.381	124.383	186.132	366.192	285.376	244.248	416.996	87.8595	413.377	264.181
62.5015	57.1135	224.094	122.568	226.448	72.177	120.021	308.052	196.584	96.5632	644.158	275.514	424.501	99.9303	249.243	573.784	415.948
153.21	60.653	121.976	282.143	186.202	106.086	138.545	309.267	178.635	291.065	143.246	130.59	229.371	174.75	212.623	279.214	103.442
86.9227	87.2775	200.88	149.333	131.194	291.544	102.588	94.8095	574.491	195.262	390.69	81.6587	605.589	189.885	162.175	522.359	384.7
78.2091	88.9713	252.106	199.561	180.599	233.111	69.207	736.939	139.294	146.687	280.957	157.786	649.082	215.258	54.7452	403.034	104.408
174.015	463.777	46.6524	61.9374	63.242	134.163	151.673	137.583	394.97	566.984	171.749	494.902	413.594	325.038	306.007	239.595	670.968
143.676	57.9527	48.0793	105.628	125.44	90.9174	132.519	435.704	191.681	270.2	70.4059	246.23	823.857	97.7779	279.635	164.601	124.069
62.7434	338.594	206.131	188.583	64.4295	317.23	34.7073	230.947	702.347	211.228	198.185	334.516	370.135	740.196	307.282	589.199	98.2456
69.7576	104.698	129.867	73.8757	137.412	72.3534	200.625	165.145	86.9651	199.756	119.035	327.562	363.09	205.274	478.362	278.795	77.9306
51.54	115.564	67.0298	191.606	98.0862	256.712	231.135	1008.36	126.929	213.692	141.675	248.701	87.0747	664.679	74.4701	299.12	126.623
138.478	97.4535	144.299	106.49	145.845	275.853	349.632	404.789	183.153	656.123	85.3182	96.187	185.484	414.851	212.084	218.548	421.906
188.349	86.6634	125.231	98.0567	68.3475	125.611	100.878	161.066	802.082	103.693	178.558	142.737	256.821	85.9906	265.671	129.69	305.394
49.6078	126.44	100.315	75.1108	344.094	110.35	161.456	163.954	448.102	213.472	323.908	800.814	102.421	344.921	552.259	192.561	190.406
101.355	102.631	119.857	397.15	98.5076	94.7665	221.622	304.595	671.381	277.344	77.8578	137.783	91.7337	449.978	364.209	101.76	220.3
86.2236	27.2324	46.3268	36.0168	145.798	93.2936	361.448	167.73	392.762	187.08	180.625	319.079	152.387	281.341	76.8463	433.622	271.65
175.504	141.199	113.871	105.965	62.9897	235.925	90.7209	201.339	430.82	269.972	173.964	248.943	161.611	625.398	497.122	245.227	125.712
148.121	58.9599	544.345	88.4269	314.845	223.708	85.7949	66.6226	219.556	182.868	199.344	194.429	249.766	544.255	92.8793	248.067	274.41
196.928	66.5791	330.408	75.9926	78.27	247.248	128.174	910.561	424.729	157.647	91.9016	138.286	118.01	236.955	95.0036	138.074	89.4187
61.8965	152.125	134.956	171.556	109.248	134.127	211.637	430.639	150.713	197.355	113.085	271.666	130.845	315.814	152.236	198.972	76.1126
184.597	95.9918	72.7137	71.1352	184.983	125.149	77.8376	178.329	306.347	398.873	153.841	168.595	195.305	203.252	140.681	124.263	277.376
72.5478	139.979	274.167	247.828	83.1581	315.844	103.55	309.719	266.492	96.4712	185.499	335.203	136.068	590.877	138.211	88.8463	206.139
181.742	150.256	88.9699	337.793	515.124	223.728	168.45	225.427	219.295	226.746	68.6821	180.956	142.528	141.227	83.5934	704.145	243.06
102.198	94.045	187.56	57.6822	230.894	117.256	187.82	173.955	200.331	231.912	343.393	334.3	250.58	182.851	87.7091	85.228	184.226
131.309	204.496	67.2164	479.609	46.5746	72.8162	231.314	343.452	350.731	149.783	217.456	185.802	382.648	185.869	308.132	375.649	129.693
174.124	92.3213	293.078	55.7268	149.445	349.434	78.7305	781.955	555.649	340.195	75.9382	445.327	151.784	253.054	230.018	243.444	377.126
84.9529	77.9596	45.5294	498.131	355.885	138.049	208.252	213.04	315.288	230.978	55.1234	371.189	100.127	400.225	88.5736	292.91	192.061
146.213	167.086	265.286	44.4883	38.6944	99.7551	93.5669	468.473	213.749	295.068	104.517	48.3002	59.5791	125.172	167.98	258.25	118.699
34.4202	134.504	67.0071	58.1453	94.8768	53.9064	60.6495	509.295	206.999	74.8952	132.668	225.389	101.882	685.896	599.355	95.753	434.894
179.958	89.0605	115.636	79.6648	168.393	94.5915	58.9432	327.758	364.178	181.813	192.379	68.3824	177.293	232.171	154.075	105.355	256.217
179.445	105.558	140.258	169.392	142.189	183.718	49.3952	272.882	573.398	185.908	162.816	105.649	387.067	133.917	150.898	176.121	372.828
139.849	26.313	262.099	310.389	82.0331	78.4252	160.627	403.39	276.257	152.016	298.701	81.5939	127.467	261.637	49.8852	82.648	369.623
361.461	110.715	83.5539	82.5572	115.134	180.077	660.099	219.625	444.131	100.542	79.0065	119.624	102.446	100.808	160.635	410.242	223.179
243.747	150.427	120.825	806.536	795.325	109.232	105.227	275.504	311.613	193.137	61.2009	156.137	122.546	308.955	378.006	78.5896	783.371
119.653	147.603	106.939	282.027	360.121	165.352	156.022	426.237	73.8444	400.539	194.707	212.663	81.0472	102.69	151.877	89.6099	441.153
181.18	56.0442	88.3449	118.711	70.8561	200.153	85.1739	238.4	341.802	472.296	81.6511	506.644	221	635.289	201.752	116.735	264.718
184.988	110.272	404.077	149.44	47.6889	91.1258	154.078	185.279	129.884	183.421	177.561	141.47	236.323	243.544	87.2651	214.39	358.541
75.9765	69.8796	115.75	65.4764	59.6081	226.696	121.319	523.292	372.915	557.168	67.8129	88.7999	278.476	107.454	94.5427	179.041	339.945
83.3247	151.726	395.679	221.427	238.272	112.914	60.6606	173.141	76.3849	101.449	49.1986	107.954	49.3824	131.426	233.412	222.428	401.743
148.237	92.7855	67.2638	90.1221	46.7846	146.12	70.5076	199.529	135.876	162.584	69.8231	424.124	208.45	175.922	60.4548	222.428	479.445
198.454	428.22	221.357	238.401	195.588	214.011	54.3922	114.89	173.55	117.172	69.3094	65.13	325.098	64.6883	496.383	211.514	199.47
225.245	163.461	138.414	207.3	66.6658	143.791	232.124	280.876	83.0952	374.626	179.844	65.7636	107.693	173.743	259.658	246.247	148.56
97.6333	89.8377	85.4891	340.166	72.2874	84.1262	93.4679	150.42	347.148	93.9697	453.957	216.367	711.502	245.693	266.815	121.835	232.241
140.607	174.355	89.5241	79.3281	134.692	77.9275	401.229	260.985	171.322	393.097	125.264	207.104	509.431	336.121	278.925	161.977	297.453
324.347	163.838	58.242	25.5869	220.892	145.107	107.42	118.666	357.951	274.548	88.3489	108.115	270.892	119.777	192.108	102.84	400.578
125.282	95.1812	102.316	206.637	75.9398	140.719	304.184	132.049	107.866	201.308	164.202	222.337	432.23	153.584	188.099	335.901	260.815
229.702	100.762	250.579	214.697	218.241	135.385	146.672	481.111	257.632	99.263	330.524	864.063	679.427	67.1303	353.747	314.327	376.161
65.6312	170.51	288.227	193.19	251.364	242.721	254.592	419.621	252.069	234.475	87.2915	76.7119		115.057	326.422	85.1322	136.192
293.53	134.788	90.9761	135.584	88.508	242.918	79.4031	217.135	689.9	239.064	102.777	84.3117		414.187	583.755	111.799	576.49
133.567	135.295	83.8644	216.713	133.303	426.479	98.4015	200.416	111.379	103.772	40.0787	237.802		81.5091	147.477	447.452	543.349
286.517	90.7425	185.658	63.7429	495.295	246.407	94.9142	244.771	141.907	610.601	49.4747	438.861		227.365	123.136	228.091	516.525
155.523	136.609	133.918	207.729	46.434	384.832	78.4635	368.141	338.039	147.364	177.146	214.759		126.265	112.231	120.844	386.034
204.993	90.0329	81.6727	53.3423	164.315	64.5306	78.7967	70.9349	111.798	418.365	93.0566	158.911		64.2692	225.951	79.6508	397.2
199.224	165.926	142.193	119.844	480.329	873.84	63.7262	284.819	156.997	105.213	176.922	182.229		125.817	116.392	119.861	217.148
153.217	155.188	232.228	88.2071	227.345	190.601	75.0976	157.9	464.603	217.917	72.0655	137.062		257.824	229.98	197.668	352.365
116.054	311.937	106.404	36.9123	297.595	460.632	76.5802	276.906	83.6925	135.005	189.7	275.557		136.249	135.524	221.701	360.922
111.934	276.678	116.536	37.2118	89.9116	481.986	197.803	624.051	803.13	151.443	88.5468	149.834		194.915	209.568	435.435	885.74
62.5266	81.741	109.64	66.1244	539.744	202.717	113.16	609.832	496.197	105.943	111.429	215.672		242.261	308.898	164.022	129.024
313.944	285.544	158.761	521.842	311.158	311.067	96.8485	138.426	592.756	251.314	146.459	183.937			166.683	165.441	239.523
313.944	82.6095	131.194	165.1	227.802	220.506	63.2222	130.989	245.031	184.137	124.848	233.964			375.123	152.12	215.02
130.814	144.017	160.245	140.399	116.258	224.976	99.118	384.205	111.492	363.347		346.111			55.0095	414.341	209.196
116.515	69.7005	82.4876	197.423	70.944	279.534	314.417	725.191	236.27	314.541		298.154			125.636	330.369	403.844
338.024	271.761	273.497	236.959	343.388	125.99	110.15	500.304	119.492	256.823		371.723			226.422	758.354	186.06
150.091	76.5697	454.141	264.501	90.1314	486.788	86.92	802.751	323.607	231.647		298.466			234.569	222.273	121.155
141.838	623.068	875.62	174.545	197.728	212.794	181.385	650.211	140.778	127.357		218.244			103.525	262.004	332.902
95.3645	53.537	361.523		170.305	94.3308	163.685	127.582	148.734	179.151		325.724			232.489	160.734	335.616
86.814	141.015	42.7735			114.209	146.656	346.407	270.015	234.356		71.9658			56.5055	301.248	640.903
221.06	116.219	134.08			378.319	131.382	243.202	349.176	158.106		210.828			60.9601	259.932	243.338
	35.4671	181.036				532.476	434.485	269.923	476.315		362.408			45.8324	309.32	134.022
	119.287	144.443				215.635	434.485	758.812	724.081		138.763			475.956	201.887	220.192
	43.2174	209.495				234.256	439.918	471.029	112.159		155.978			192.666	215.35	509.71
	54.3379	616.777				296.4	84.355	147.213	331.466		88.5148			323.718	142.543	97.3766
	89.5659	189.264				150.56	162.22	507.432	338.842		74.6299			168.203	107.811	439.26
	475.035	460.776				254.882	212.262	136.248			323.489			314.543	128.041	225.974
	465.26	188.337				264.983	231.535	419.191						99.322		113.766
	194.662					396.668		161.263						57.711		221.485
	495.488					226.978		307.359						151.124		198.785
						196.697		270.911						163.144		243.921
						578.565		189.118						93.2399		560.644
						583.971		187.877						372.151		114.647
						294.791		400.988						370.503		152.708
						624.073		715.076						227.492		163.326
						214.292		151.407						236.397		539.621
						99.5146		182.072						124.163		339.591
								174.558								90.9767
																551.34
																93.4456
																326.46

## Sheet: Figure 1F
0d	1d	3d
0.92	0.87	0.78
1.21	0.71	0.58
0.87	0.94	0.58
0.69	0.76	0.72
0.91	0.8	0.75
1.08	1.08	0.7
1.01	0.89	0.74
1.18	0.98	0.8
1.12	0.87	0.53

## Sheet: Figure 1H
0d	1d	3d	7d
1.07	1.19	0.53	0.67
0.96	0.83	0.48	0.59
0.97	1.12	0.43	0.66
