# Supplementary material for: Promoting axon regeneration by inhibiting RNA N6-methyladenosine demethylase ALKBH5
Source: eLife. 2023 Aug 3;12:e85309. doi: 10.7554/eLife.85309 (PMC10400074; doi:10.7554/eLife.85309)
Supplement: Figure 1—source data 2. [file elife-85309-fig1-data2.xlsx]

## Sheet: Figure 1- figure supplement 1C
	Percentage of Cy3+ cells in DRG neuron (%)
	87.3134
	86.6197
	88.7006
	86.5922
	88.8889
	87.0786
	91.8605
	82.5581
	78.5124
	95.082

## Sheet: Figure 1- figure supplement 1D
	siControl			siRNA1			siRNA2
Mettl3	1.03593	0.965388	0.99868	0.43681	0.477668	0.463621	0.496463	0.520094	0.553858
Wtap	1.05314	1.00826	0.938606	0.306254	0.305781	0.324309	0.597314	0.596957	0.587915
Fto	0.935476	0.903424	1.1611	0.185101	0.287293	0.296353	0.24534	0.333858	0.253291
Alkbh5	1.02644	0.97917	0.994392	0.333207	0.244034	0.344744	0.481565	0.515446	0.362762
Ythdc1	1.07532	1.052	0.872676	0.467246	0.491689	0.431777	0.430342	0.431954	0.461314
Ythdf1	0.980727	1.03966	0.979609	0.674634	0.622213	0.676949	0.583226	0.566058	0.614045
Ythdf2	1.07865	0.944238	0.977115	0.581718	0.575346	0.505802	0.463941	0.484369	0.514768
Ythdf3	0.952364	1.10774	0.939897	0.45294	0.468524	0.425978	0.633116	0.582353	0.495951

## Sheet: Figure 1- figure supplement 1F
NF200+	CGRP+	IB4+
53.36	22.75	43.92
56.32	16.93	32.87
40.89	18.55	30.29
50.93	28.93	25.47
47	13.13	14.58
62.69	14.11	35.88
