# Supplementary material for: Promoting axon regeneration by inhibiting RNA N6-methyladenosine demethylase ALKBH5
Source: eLife. 2023 Aug 3;12:e85309. doi: 10.7554/eLife.85309 (PMC10400074; doi:10.7554/eLife.85309)
Supplement: Figure 2—source data 1. [file elife-85309-fig2-data1.xlsx]

## Sheet: Figure 2B
Control	wt-Alkbh5	mut-Alkbh5
0.79	4.15	1.84
1.04	3.84	1.68
1.17	3.99	1.9

## Sheet: Figure 2E
Control	wt-ALKBH5	mut-ALKBH5
128	139.81	713.52
300.06	49.13	290.4
168.74	68.61	66.96
276.5	520.89	53.92
208.35	104.44	89.92
99.08	144.54	208.08
215.57	94.27	73.6
216.99	235.72	110.88
291.25	105.88	74.16
325.2	114.31	131.52
100.96	242.24	505.76
256.63	276.62	63.92
64	68.39	530
102.87	178.08	214.56
264.1	101.18	167.6
102.21	121.07	719.84
155.4	135.48	187.84
159.8	75.26	98.96
162.06	94.19	143.36
239.65	101.9	478.4
104.84	39.29	333.92
160.3	62.07	230.08
72.22	155.62	76.72
134.92	323.1	83.44
144.24	118.58	202.88
255.61	52.17	360
595.55	67.96	64.8
145.23	51.36	652.88
232.86	121.17	236
216.9	123.79	162.08
437.41	187.01	185.6
191.98	126.36	282.56
214.65	221.32	349.28
252.81	120.47	367.28
370.29	242.44	326.16
110.63	95.27	152.8
315.6	138.14	356.96
166.39	221.54	233.52
717.7	50.18	251.52
259.62	70.44	454.08
235.7	171.75	56.64
80.36	163.37	90.48
303.12	76.67	51.76
326.05	113.21	119.52
140.69	113.38	140.32
199.18	309.23	216.08
416.2	90.95	188.8
261.03	117.02	135.76
112.86	87.71	411.84
537.68	130.39	239.52
215.54	156.7	370.96
498	125.41	433.28
221.15	232.22	378
242.23	104.32	222.64
381.41	137.16	218.64
425.36	318.17	386.24
228.69	178.92	104.08
183.84	64.47	294.16
467.67	147.96	197.92
488.64	335.23	336.72
108.36	82.62	197.04
110.25	100.25	202.72
146.91	174.33	200.88
479.46	90.62	135.04
382.65	371.88	567.68
360.36	100.73	107.92
106.6	150.26	69.04
283.97	88.57	284.72
89.65	147.41	232.4
508.75	118.61	213.44
192.45	476.4	138.48
215.68	177.07	370.4
212.36	94.14	115.2
427.05	286.14	138.88
277.26	193.16	462
529.52	151.01	323.84
240.44	222.69	217.36
168.33	86.11	804.24
116.53	137.63	268.64
516.39	99.75	314.96
226.51	173.72	432.56
272.08	190.34	443.76
276.12	180.75	57.68
157.18	220.17	224.48
463.72	212.47	67.36
221.42	119.99	192.56
450.4	215.51	57.04
157.45	188.67	299.2
327.67	119.95	112.48
	243.67	182.72
	211.43	146.8
	99.19	296.88
	327.46	110.72
	584.83	139.76
	47.23	74.72
	178.19	113.28
	167.48	78.56
	96.31	311.12
	134.34	75.28
	189.37	152.16
	181.71	374.56
	94.7	115.68
	296.95	110.4
	105.68	92.4
	329.72	93.6
	241.92	148.64
	173.88	104.4
		436.72
		113.76
		222.08
		106.96
		52.8
		142.32
		429.36
		477.36
		129.36
		72.32
		794.56
		731.44
		314.24
		170.8
		837.12

## Sheet: Figure 2H
	Control			wt-ALKBH5			mut-ALKBH5
	Mean	SD		Mean	SD		Mean	SD
	1	0		1	0		1	0
	0.92	0.06		0.69	0.24		0.87	0.13
	0.89	0.06		0.63	0.23		0.82	0.15
	0.81	0.09		0.52	0.17		0.76	0.21
	0.73	0.19		0.42	0.18		0.69	0.11
	0.63	0.22		0.31	0.1		0.58	0.13
	0.53	0.18		0.13	0.03		0.42	0.15
	0.37	0.1		0	0		0.28	0.16
	0.21	0.15		0	0		0.18	0.13
	0.09	0.13		0	0		0.06	0.06
	0	0		0	0		0	0
	0	0		0	0		0	0

## Sheet: Figure 2I
Control	wt-ALKBH5	mut-ALKBH5
4.47	3.42	3.9
4.67	3.35	4.1
3.68	3.25	3.6
3.29	2.66	3.4
3.39	2.66	4.2
3.39	2.3	3.6
3.98	3.29	3.8
