# Supplementary material for: Promoting axon regeneration by inhibiting RNA N6-methyladenosine demethylase ALKBH5
Source: eLife. 2023 Aug 3;12:e85309. doi: 10.7554/eLife.85309 (PMC10400074; doi:10.7554/eLife.85309)
Supplement: Figure 2—source data 2. [file elife-85309-fig2-data2.xlsx]

## Sheet: Figure 2- figure supplement 1
Control	wt-ALKBH5	mut-ALKBH5
42.25	34.32	23.74
35.82	37.64	31.8
32.49	29.17	29.8
38.13	28.86	31.49
22.66	28.1	37.12
26.72	37.76	44.33
