# Supplementary material for: Promoting axon regeneration by inhibiting RNA N6-methyladenosine demethylase ALKBH5
Source: eLife. 2023 Aug 3;12:e85309. doi: 10.7554/eLife.85309 (PMC10400074; doi:10.7554/eLife.85309)
Supplement: Figure 3—source data 1. [file elife-85309-fig3-data1.xlsx]

## Sheet: Figure 3B
NC	KD1	KD2
1.06	0.61	0.59
0.96	0.4	0.33
0.98	0.64	0.54

## Sheet: Figure 3E
NC	KD1	KD2
149.01	510.8	214.08
90.19	586.2	506.14
340.98	133.34	356.38
87.62	350.31	658.54
187.84	158.23	248.2
113.31	254.25	333.5
161.82	202.81	234.16
80.5	335.14	363.4
130.71	217.72	321.53
230.52	175.69	182.7
386.62	295.45	233.42
184.06	208.58	293.72
173.93	288.95	390.54
95.88	299.73	286.69
177.27	108.88	428.13
153.55	159.66	463.27
164.68	185.93	178.71
179.51	127.45	305.63
113.77	320.42	658.81
96.17	553.9	261.2
472.34	175.67	163.31
279.72	178.86	291.27
326.19	179.13	144.58
233.53	405.46	284.2
494.45	191.38	180.74
337.88	334.71	217.29
126.32	154.27	197.91
294.34	142.56	319.67
285.77	307.82	370.54
229.8	325.58	479.25
165.94	296.94	339.21
154.66	274.64	323.76
162.41	146.69	301.96
114.13	309.72	197.74
170.65	170.74	182.97
367.95	208.36	185.89
249.75	123.46	212.46
334.92	326.32	136.63
237.72	255.31	434.71
483.13	222.85	373.24
216.62	161.26	171.29
207.6	276	264.82
135.23	222.28	147.67
165.4	252.01	143.73
339.69	176.23	196.62
430.14	166.26	233.46
187.93	219.19	115.27
344.28	317.44	218.76
146.4	213.78	157.17
156.87	303.87	361.19
189.99	472.43	242.31
155.55	413.35	287.29
282	452	374.21
302.96	185.54	226.12
185.77	168.8	335.75
266.89	214.08	284.67
507.15	459.81	203.74
168.16	159.1	369.04
195.36	171.66	128.76
201.07	199.09	149.92
283.17	232.17	201.72
154.52	610.92	294.34
117.81	242.29	290.58
570.92	480.9	255.18
287.98	366.83	193.19
164.02	94.63	372.07
423.51	256.64	189.68
120.58	197.23	240.6
210.32	231.72	169.29
154.88	387.68	333.98
155.07	434.22	279.94
211.26	218.87	198.63
415.04	324.08	380.65
153.92	368.28	244.89
178.3	158.99	390.72
299.69	368.78	352.35
183.73	277.29	194.37
106.45	319.14	298.21
294.79	139.87	310.64
117.37	224.51	234.86
115.03	260.16	277.08
107.08	203.49	262.05
96.85	215.85	212.74
166.07	191.72	565.32
143.45	343.88	225.31
142.27	357	261.73
	617.91	309.93
	485.83	186.47
	567	515.89
	357.16	220.5
	179.15	373.94
	381.34	217.4
	287.15	249.83
	164.56	298.26
	240.09

## Sheet: Figure 3H
	NC			KD1			KD2
	Mean	SD		Mean	SD		Mean	SD
	1	0		1	0		1	0
	0.9	0.05		0.86	0.07		0.92	0.11
	0.75	0.15		0.74	0.08		0.75	0.09
	0.67	0.11		0.67	0.12		0.67	0.11
	0.63	0.13		0.64	0.1		0.64	0.1
	0.44	0.07		0.54	0.16		0.54	0.12
	0.34	0.12		0.48	0.12		0.51	0.11
	0.14	0.15		0.33	0.16		0.46	0.11
	0.08	0.1		0.19	0.06		0.35	0.14
	0	0		0.13	0.1		0.22	0.26
	0	0		0.07	0.06		0.16	0.21
	0	0		0.06	0.06		0.15	0.2
	0	0		0.03	0.004		0.11	0.09
	0	0		0	0		0.08	0.02
	0	0		0	0		0	0

## Sheet: Figure 3I
NC	KD1	KD2
3.12	4.8	3.52
3.15	4.6	4.48
2.75	3.46	3.78
2.82	3.57	4.56
3.69	4.17	4.8
3.93	4.58	5.64
3.86	5.57	5.52
3.31		4.92
