# Supplementary material for: Promoting axon regeneration by inhibiting RNA N6-methyladenosine demethylase ALKBH5
Source: eLife. 2023 Aug 3;12:e85309. doi: 10.7554/eLife.85309 (PMC10400074; doi:10.7554/eLife.85309)
Supplement: Figure 3—source data 2. [file elife-85309-fig3-data2.xlsx]

## Sheet: Figure 3- figure supplement 1B
NC	KD1	KD2
108.04	62.57	130.72
167.56	61.62	46.22
69.98	59.13	246.09
66.65	310.42	139.5
86.57	209.15	47.76
132.16	111.8	288.28
175.37	156.55	176.07
279.88	39.13	184.26
77.62	24.95	139.68
68.79	20.04	184.31
119.41	264.87	580.58
147.45	139.6	435.81
276.75	248.67	259.88
199.05	173.86	192.39
204.67	125.43	107.66
149.19	66.69	159.72
167.09	543.21	82.28
161.23	37.11	73.3
258.22	60.95	187.2
251.64	14.69	65.24
267.21	368.99	294.05
77.5	115.49	88.63
106.1	177.39	91.78
57.58	65.98	127.88
90.85	28.44	354.34
435.76	33.19	115.43
269.74	324.28	115.43
69.62	103.52	70.82
180.48	94.42	83.88
53.98	256.71	155.64
72.71	55.72	93.81
119.09	189.54	82.7
82.65	136.08	87.21
65.9	129.51	115.91
310.42	167.72	132.81
178.42	107.8	143.46
61.23	172.63	197.66
36.87	294.85	195.5
408.04	24.04	210.27
117.54	393.9	100.33
224.28	141.27	85.92
241.74	32.28	246.04
92.16	39.56	206.31
168.67	149.58	99.68
47.01	461.66	79.12
370.65	28.44	115.5
42.73	632.75	153.06
34.42	446.61	106.39
112.51	232.87	151.39
180.55	122.42	91.49
32.63	31.09	231.5
112.51	206.97	462.71
180.55	289.27	136.63
32.63	481.54	117.52
36.71	468.59	191.86
74.06	362.81	182.88
105.9	116.36	122.37
72.87	217.86	75
43.96	74.1	458.54
52.12	210.61	82.35
29.74	380.12	147.25
69.23	319.09	298.81
75.25	108.2	99.35
136.2	146.22	197.2
58.14	363.41	326.94
199.09	113.7	367.06
201.66	138.38	80.97
29.94	180.44	95.75
62.61	31.72	98.03
56.55	94.65	55.55
100.28	72.28	153.96
156.95	48.28	92.92
37.5	128.55	197.03
132.99	474.77	86.55
107.72	400.16	163.87
37.15	28.63	60.18
82.73	94.14	166.65
114.57	392.4	50.42
64	212.08	62.86
43.96	41.94	61.07
34.34	132.24	42.24
114.42	53.15	307
46.26	510.34	82.51
21.7	139.37	398.03
23.33	181.23	124.2
30.1	191.33	242.55
68.99	38.65	114.46
31.37	286.85	114.46
90.65	55.37	59.39
344.99	73.47	164.5
32.87	68.4	122.16
50.22	205.39	45.99
22.81	92.71	114.68
20.75	88.55	98.89
33.66	515.52	84.06
69.62	183.68	72.79
50.1	78.14	679.53
70.38	125.7	301.11
24.32	373.39	608.74
48	90.34	106.79
74.69	127.29	106.5
96.32	121.15	242.15
81.27	131.29	101.29
25.03	147.52	194.18
98.14	194.5	63.7
96.87	82.26	330.41
41.23	143.01	157.41
52.75	28.99	259.5
52.28	208.08	77.65
	44.87	125.02
	26.65	120.69
	115.41

## Sheet: Figure 3- figure supplement 2B 
NC	KD1	KD2
32.62	35.37	45.96
40.54	44.34	38.81
44.86	29.88	47.67
37.26	34.18	26.11
38.38	33.49	40.67
27.97	38.31	31.51

## Sheet: Figure 3- figure supplement 3A
	Z56957173
DMSO	0.5μM	1μM	2μM	5μM
101.328	100.244	89.6776	101.599	98.2931
96.505	106.909	100.731	103.603	103.603
101.869	96.9927	97.5345	101.436	101.382
100.298	99.2143	98.0764	108.101	97.8055

## Sheet: Figure 3- figure supplement 3B
	Z52453295
DMSO	5μM	10μM	20μM	40μM	80μM
101.328	104.741	95.8548	89.6776	50.3929	17.502
96.505	98.6183	106.692	88.5939	46.925	18.369
101.869	95.8006	95.3129	102.791	49.851	17.6104
100.298	92.2243	89.0815	95.8006	48.4963	18.7483

## Sheet: Figure 3- figure supplement 3D
DMSO	0.5μM	2μM	10μM	20μM
34.8225	293.354	136.874	342.507	163.446
109.175	94.0397	400.407	249.156	126.84
252.746	707.37	168.276	342.507	91.5846
49.7957	142.712	85.7267	249.156	144.36
130.288	247.06	345.738	249.38	432.626
267.944	132.853	289.303	218.411	383.735
111.35	145.833	465.861	454.096	118.541
96.1989	428.704	259.544	828.787	138.665
280.048	447.267	363.549	487.673	192.479
100.75	223.549	464.606	111.417	161.734
303.337	144.018	141.543	163.82	307.807
308.832	218.918	327.127	205.158	134.336
49.7354	128.389	73.9765	100.212	311.954
84.0187	138.172	163.8	173.273	179.475
123.072	124.73	176.72	212.506	133.86
121.845	190.526	130.633	252.193	174.023
207.284	442.814	247.858	621.5	369.046
206.404	246.59	144.698	100.781	179.429
135.553	310.409	155.984	326.331	253.629
215.335	242.652	251.038	359.589	469.113
106.548	132.163	184.101	267.786	198.475
681.261	251.912	193.104	133.409	165.619
109.239	62.819	181.283	219.536	436.697
126.881	476.581	343.482	393.392	258.973
167.026	559.889	865.053	171.756	667.24
146.889	196.475	285.618	425.99	227.665
92.2226	210.953	325.366	210.734	268.241
155.681	296.565	476.378	374.47	387.895
35.6765	394.294	124.994	111.956	248.501
153.812	188.023	206.795	200.706	161.082
51.4534	391.766	227.475	563.553	153.808
531.782	183.651	515.254	139.002	127.515
187.5	348.649	289.198	148.133	286.216
43.6414	311.588	132.998	530.208	183.151
86.91	106.579	190.235	435.111	324.256
187.186	123.007	219.3	247.192	255.628
292.166	103.228	246.562	294.01	327.137
195.845	403.015	606.16	265.704	123.295
352.127	151.939	77.8261	151.342	123.295
124.079	217.162	148.308	199.286	238.202
107.806	220.283	169.112	301.468	212.861
133.001	151.433	79.4102	523.379	158.065
298.736	161.434	62.4402	363.51	191.897
486.495	274.751	218.28	171.732	145.414
173.559	128.227	143.88	298.296	214.996
437.349	294.062	134.166	399.993	154.256
69.7678	842.174	72.7675	182.544	219.263
195.909	336.164	163.445	277.577	61.8387
102.41	213.603	281.275	226.327	124.053
257.329	182.535	341.694	152.87	301.699
136.103	247.878	70.2019	169.801	194.397
302.492	111.207	43.9598	145.216	222.388
294.365	144.304	70.8921	217.616	154.593
107.481	232.193	370.284	192.303	313.015
139.674	214.613	58.7719	532.671	278.169
220.947	254.617	290.168	195.016	802.861
195.738	161.921	176.466	197.595	177.161
298.491	326.264	203.113	342.075	486.349
200.17	95.9689	266.262	120.6	168.731
103.261	493.779	61.0649	296.273	290.254
135.725	117.121	228.477	218.897	235.537
439.071	501.473	153.769	346.087	325.229
385.393	262.024	67.8802	90.5279	239.172
150.082	429.931	298.412	549.352	117.838
127.324	142.303	246.613	396.221	203.591
187.899	496.407	150.665	231.077	86.808
151.258	243.882	266.632	121.397	189.149
313.362	262.351	291.896	166.912	243.13
191.441	283.254	468.06	262.475	203.055
	267.072	115.276	198.993	467.647
	153.154	107.389	260.931	349.257
	216.727	284.51	141.189	230.789
	451.163	278.001	212.559	369.015
	119.727	152.208	327.138	142.323
	277.593	265.16		150.326
	172.286	61.815		404.97
	278.872	174.188		455.56
	213.935	170.989		248.752
	371.349	126.647		195.547
		153.912		186.222
		241.219		158.587
		393.93
		309.612
		200.866
		251.715
		305.641
		202.269
		184.486
		353.002

## Sheet: Figure 3- figure supplement 3F
DMSO	100mM	25mM	6.25mM	1.56mM
3.04529	3.15225	4.83588	5.32327	3.47523
4.029	4.08155	5.09709	5.75284	4.12564
3.48203	3.62546	4.36373	4.2788	4.40655
3.7122	3.8459	3.87134	4.77317	3.69478
3.58494	3.48996	4.37794	5.30334	4.01746
