# Supplementary material for: Promoting axon regeneration by inhibiting RNA N6-methyladenosine demethylase ALKBH5
Source: eLife. 2023 Aug 3;12:e85309. doi: 10.7554/eLife.85309 (PMC10400074; doi:10.7554/eLife.85309)
Supplement: Figure 4—source data 1. [file elife-85309-fig4-data1.xlsx]

## Sheet: Figure 4A
path_id	path_name	path_diffgene_count	path_gene_count	enrichment	pvalue
04010	MAPK signaling pathway	8	299	4.07151	0.00350925
04080	Neuroactive ligand-receptor interaction	7	292	3.64797	0.0134443
00120	Primary bile acid biosynthesis	2	16	19.0216	0.0194357
01100	Metabolic pathways	18	1347	2.03349	0.0199588
04360	Axon guidance	5	178	4.27451	0.0264832
00360	Phenylalanine metabolism	2	22	13.8339	0.0364563
05200	Pathways in cancer	9	538	2.54564	0.0389543
05322	Systemic lupus erythematosus	4	127	4.79284	0.0401473
00340	Histidine metabolism	2	24	12.6811	0.0431842
00190	Oxidative phosphorylation	4	143	4.25658	0.059846
03320	PPAR signaling pathway	3	82	5.56729	0.0679215
04925	Aldosterone synthesis and secretion	3	84	5.43474	0.0723858
04060	Cytokine-cytokine receptor interaction	5	230	3.3081	0.0736279
05203	Viral carcinogenesis	5	230	3.3081	0.0736279
00410	beta-Alanine metabolism	2	33	9.22259	0.0794783
00350	Tyrosine metabolism	2	39	7.80373	0.108712
04151	PI3K-Akt signaling pathway	6	346	2.63883	0.110164
05034	Alcoholism	4	175	3.47823	0.115203
03440	Homologous recombination	2	41	7.42306	0.119279
03022	Basal transcription factors	2	45	6.76323	0.141572
04659	Th17 cell differentiation	3	109	4.18824	0.141664
03420	Nucleotide excision repair	2	47	6.47543	0.153275
00510	N-Glycan biosynthesis	2	51	5.96756	0.177735
04979	Cholesterol metabolism	2	51	5.96756	0.177735
05016	Huntington's disease	4	202	3.01332	0.179602
03460	Fanconi anemia pathway	2	52	5.85279	0.184062
04370	VEGF signaling pathway	2	58	5.24733	0.223696
04122	Sulfur relay system	1	9	16.9081	0.23047
00130	Ubiquinone and other terpenoid-quinone biosynthesis	1	12	12.6811	0.304315
04014	Ras signaling pathway	4	242	2.51525	0.305169
05012	Parkinson's disease	3	152	3.00341	0.316609
00010	Glycolysis / Gluconeogenesis	2	72	4.22702	0.326096
00982	Drug metabolism - cytochrome P450	2	72	4.22702	0.326096
04630	Jak-STAT signaling pathway	3	155	2.94528	0.331214
00980	Metabolism of xenobiotics by cytochrome P450	2	73	4.16911	0.333879
05412	Arrhythmogenic right ventricular cardiomyopathy (ARVC)	2	73	4.16911	0.333879
05133	Pertussis	2	74	4.11277	0.341719
04932	Non-alcoholic fatty liver disease (NAFLD)	3	159	2.87118	0.351131
00604	Glycosphingolipid biosynthesis - ganglio series	1	15	10.1448	0.376717
04260	Cardiac muscle contraction	2	81	3.75735	0.39809
00603	Glycosphingolipid biosynthesis - globo and isoglobo series	1	16	9.51079	0.400536
04610	Complement and coagulation cascades	2	83	3.66681	0.414646
00730	Thiamine metabolism	1	17	8.95133	0.424199
04144	Endocytosis	4	275	2.21342	0.434372
05410	Hypertrophic cardiomyopathy (HCM)	2	86	3.5389	0.439825
04514	Cell adhesion molecules (CAMs)	3	176	2.59385	0.441105
05225	Hepatocellular carcinoma	3	179	2.55038	0.457824
00511	Other glycan degradation	1	19	8.00909	0.471061
05414	Dilated cardiomyopathy (DCM)	2	91	3.34445	0.482646
05202	Transcriptional misregulation in cancer	3	184	2.48108	0.486213
05010	Alzheimer's disease	3	185	2.46766	0.491967
04974	Protein digestion and absorption	2	93	3.27253	0.500053
04658	Th1 and Th2 cell differentiation	2	94	3.23772	0.508813
05204	Chemical carcinogenesis	2	94	3.23772	0.508813
00531	Glycosaminoglycan degradation	1	21	7.24632	0.51731
04915	Estrogen signaling pathway	2	95	3.20363	0.517609
05166	HTLV-I infection	4	294	2.07038	0.518215
05416	Viral myocarditis	2	96	3.17026	0.52644
04640	Hematopoietic cell lineage	2	97	3.13758	0.535306
00514	Other types of O-glycan biosynthesis	1	22	6.91694	0.540208
04713	Circadian entrainment	2	99	3.0742	0.553139
03430	Mismatch repair	1	23	6.6162	0.562956
04612	Antigen processing and presentation	2	101	3.01332	0.5711
04933	AGE-RAGE signaling pathway in diabetic complications	2	102	2.98378	0.580127
00515	Mannose type O-glycan biosynthesis	1	24	6.34053	0.585554
04977	Vitamin digestion and absorption	1	24	6.34053	0.585554
04510	Focal adhesion	3	203	2.24886	0.599573
05205	Proteoglycans in cancer	3	208	2.1948	0.630711
04660	T cell receptor signaling pathway	2	108	2.81801	0.634886
04015	Rap1 signaling pathway	3	217	2.10377	0.687969
04810	Regulation of actin cytoskeleton	3	219	2.08456	0.700891
00601	Glycosphingolipid biosynthesis - lacto and neolacto series	1	31	4.9088	0.739654
00760	Nicotinate and nicotinamide metabolism	1	31	4.9088	0.739654
04722	Neurotrophin signaling pathway	2	125	2.43476	0.794475
04726	Serotonergic synapse	2	126	2.41544	0.804018
04142	Lysosome	2	129	2.35927	0.832727
04380	Osteoclast differentiation	2	129	2.35927	0.832727
03030	DNA replication	1	36	4.22702	0.845463
04926	Relaxin signaling pathway	2	132	2.30565	0.861541
03410	Base excision repair	1	37	4.11277	0.866211
00051	Fructose and mannose metabolism	1	39	3.90186	0.907299
00620	Pyruvate metabolism	1	39	3.90186	0.907299
05143	African trypanosomiasis	1	39	3.90186	0.907299
05340	Primary immunodeficiency	1	39	3.90186	0.907299
05161	Hepatitis B	2	138	2.2054	0.919424
04975	Fat digestion and absorption	1	40	3.80432	0.927641
05219	Bladder cancer	1	40	3.80432	0.927641
04216	Ferroptosis	1	41	3.71153	0.947851
04962	Vasopressin-regulated water reabsorption	1	43	3.5389	0.987872
04978	Mineral absorption	1	46	3.3081	1
04723	Retrograde endocannabinoid signaling	2	155	1.96352	1
05226	Gastric cancer	2	155	1.96352	1
00520	Amino sugar and nucleotide sugar metabolism	1	48	3.17026	1
02010	ABC transporters	1	48	3.17026	1
04921	Oxytocin signaling pathway	2	156	1.95093	1
04930	Type II diabetes mellitus	1	50	3.04345	1
04330	Notch signaling pathway	1	52	2.9264	1
04141	Protein processing in endoplasmic reticulum	2	164	1.85576	1
04022	cGMP-PKG signaling pathway	2	167	1.82243	1
05164	Influenza A	2	170	1.79027	1
04923	Regulation of lipolysis in adipocytes	1	57	2.6697	1
05134	Legionellosis	1	58	2.62367	1
00310	Lysine degradation	1	61	2.49463	1
00561	Glycerolipid metabolism	1	62	2.4544	1
04213	Longevity regulating pathway - multiple species	1	63	2.41544	1
05230	Central carbon metabolism in cancer	1	63	2.41544	1
04622	RIG-I-like receptor signaling pathway	1	64	2.3777	1
04020	Calcium signaling pathway	2	189	1.61029	1
05221	Acute myeloid leukemia	1	66	2.30565	1
05321	Inflammatory bowel disease (IBD)	1	66	2.30565	1
04024	cAMP signaling pathway	2	196	1.55278	1
04662	B cell receptor signaling pathway	1	72	2.11351	1
04917	Prolactin signaling pathway	1	74	2.05639	1
04971	Gastric acid secretion	1	75	2.02897	1
05218	Melanoma	1	76	2.00227	1
01521	EGFR tyrosine kinase inhibitor resistance	1	80	1.90216	1
05100	Bacterial invasion of epithelial cells	1	80	1.90216	1
01524	Platinum drug resistance	1	81	1.87867	1
00590	Arachidonic acid metabolism	1	83	1.83341	1
04512	ECM-receptor interaction	1	85	1.79027	1
04146	Peroxisome	1	88	1.72923	1
04742	Taste transduction	1	89	1.70981	1
05323	Rheumatoid arthritis	1	92	1.65405	1
05032	Morphine addiction	1	93	1.63627	1
05222	Small cell lung cancer	1	95	1.60182	1
00564	Glycerophospholipid metabolism	1	98	1.55278	1
04972	Pancreatic secretion	1	98	1.55278	1
04650	Natural killer cell mediated cytotoxicity	1	99	1.5371	1
05146	Amoebiasis	1	101	1.50666	1
00240	Pyrimidine metabolism	1	104	1.4632	1
04750	Inflammatory mediator regulation of TRP channels	1	114	1.33485	1
04670	Leukocyte transendothelial migration	1	115	1.32324	1
04724	Glutamatergic synapse	1	116	1.31183	1
05145	Toxoplasmosis	1	118	1.2896	1
04071	Sphingolipid signaling pathway	1	122	1.24732	1
04270	Vascular smooth muscle contraction	1	124	1.2272	1
04611	Platelet activation	1	129	1.17963	1
04728	Dopaminergic synapse	1	132	1.15282	1
04068	FoxO signaling pathway	1	134	1.13562	1
05162	Measles	1	136	1.11892	1
03040	Spliceosome	1	138	1.1027	1
04550	Signaling pathways regulating pluripotency of stem cells	1	140	1.08695	1
04261	Adrenergic signaling in cardiomyocytes	1	144	1.05675	1
04310	Wnt signaling pathway	1	145	1.04947	1
05169	Epstein-Barr virus infection	2	229	1.32902	1
00230	Purine metabolism	1	181	0.840733	1
03010	Ribosome	1	179	0.850127	1
04062	Chemokine signaling pathway	1	177	0.859733	1
04217	Necroptosis	1	161	0.945172	1
04218	Cellular senescence	1	189	0.805146	1
04621	NOD-like receptor signaling pathway	1	166	0.916703	1
05152	Tuberculosis	1	185	0.822555	1
05165	Human papillomavirus infection	2	350	0.869558	1
05167	Kaposi's sarcoma-associated herpesvirus infection	1	213	0.714426	1
05168	Herpes simplex infection	1	219	0.694852	1
05206	MicroRNAs in cancer	1	271	0.561523	1
05224	Breast cancer	1	153	0.994593	1

## Sheet: Figure 4B
	NC			KD2
Cyp27a1	1.03807	0.8064	1.15553	1.04222	1.04222	0.999864
Aldh3b1	0.956096	1.08835	0.955554	0.651357	0.686618	0.637756
Aldh3a1	0.97486	0.941173	1.08397	1.09071	1.18467	1.07938
Galns	0.967447	0.973578	1.05897	0.656653	0.710665	0.733895
Fuk	1.12889	0.895599	0.975511	0.911222	1.1328	1.2472
Ndufa11	0.934045	1.02359	1.04237	0.869764	0.767458	0.739848
Mgat5b	0.823393	1.07272	1.10389	0.700859	0.84706	0.708416
Sec1	1.24051	0.762274	0.997213	0.86876	0.692844	0.648882
Nmrk1	0.737974	1.02283	1.23919	1.14145	1.32162	1.43189
Lpin2	0.949176	0.997169	1.05366	0.62304	0.61707	0.625977
Pold1	0.995125	1.02547	0.979403	0.714359	0.737845	0.67539
Amacr	0.874186	1.00632	1.11949	0.83495	0.946116	0.850223
Cox8a	0.987458	1.08224	0.930299	0.772638	0.846283	0.814212
St6gal1	0.975825	0.989322	1.03485	0.77441	0.759928	0.767135
Ptgs1	1.17175	0.808188	1.02006	0.900726	0.89838	0.850452
Ndufb7	0.896654	1.04027	1.06307	0.902898	0.872976	0.871937
Tpk1	0.848326	1.0763	1.07538	0.801169	0.978834	0.965944
St6galnac3	1.0134	1.06314	0.923459	0.835017	0.913977	0.921309

## Sheet: Figure 4C
	0D IgG			0D m6A			3D IgG			3D m6A
Aldh3b1	0.027043	0.022283	0.029899	5.53439	4.53914	5.39214	0.181782	0.123846	0.156405	6.97989	6.56659	6.6472
Lpin2	0.037244	0.025182	0.034668	3.36573	4.01525	3.44935	0.294185	0.251787	0.270448	5.25187	5.4047	6.69051
Galns	0.044091	0.037092	0.042454	2.53427	3.12603	2.56369	0.345413	0.321183	0.286913	4.2028	3.93075	4.45408
Pold1	0.088967	0.094177	0.146522	2.50673	2.2281	3.5991	0.094203	0.071122	0.056287	3.00673	3.12799	3.42669
St6gal1	0.32568	0.344751	0.536367	4.78707	3.60876	5.14089	0.381173	0.28778	0.227756	4.82581	5.08382	4.7601

## Sheet: Figure 4E
Control-Si	Aldh3b1-Si-1	Aldh3b1-Si-2	Lpin2-Si-1	Lpin2-Si-2	Galns-Si-1	Galns-Si-2
95.04	128.14	678.15	118.85	334.92	299.51	149.19
154.72	246.67	290.47	705.92	264.81	136.43	164.84
128.41	385.53	212.48	164.29	146.59	250.29	432.21
193.76	91.8	178.31	93.92	240.38	164.62	145.92
170.84	214.43	284.04	249.16	185.15	236.01	345.03
120.29	139.08	193.62	406.42	113.42	263.32	170.92
192.69	204.66	457.03	159.95	123.38	121.69	357.86
201.12	74.22	273.03	117.38	151.28	148.4	238.68
155.23	128.01	230.51	327.64	148.41	215.91	130.76
33.95	210.46	471.3	269.52	69.7	275.58	350.3
283.46	197.02	135.93	290.63	79.22	234.57	102.56
85.21	163.8	482.72	572.48	303.12	250.76	260.14
189.76	90.17	200.09	302.16	116.88	176.9	102.65
524.53	119.91	710.93	75.09	549.49	128.1	234.66
417.62	109.39	551.58	273.76	141.2	123.11	190.16
67.05	76.79	86.35	192.46	626.94	55.73	120.47
71.17	97.78	80.47	157.77	196.51	195.92	326.85
113.65	138.19	105.04	127.16	70.41	101.32	134.38
161.07	118.6	170.11	54.13	95.99	216.76	113.43
191.59	630.32	182.98	273.76	78.49	177.59	149.88
72.85	609.7	149.93	77.22	403.68	625.81	188.11
107.59	69.64	159.28	232.74	276.95	95.13	357.21
154.61	155.58	206.5	593.27	271.08	67.18	39.31
154.2	104.23	602.56	643.66	409.33	276.06	162.6
228.91	149.38	86.06	361.9	302.78	538.77	59.84
226.13	79.23	333.17	697.46	114.25	74.08	209.08
202.6	61.01	92.05	144.79	296.88	304.28	153.55
187.33	69.55	78.32	219.29	183.32	316.98	168.78
112.41	134.41	174.16	268.24	144.68	218.6	228.47
166.08	390.19	150.87	147.8	244.55	137.51	161.89
368.29	343.12	157.56	217.41	122.63	247.08	85.2
176.17	105.43	164.65	1030.95	194.81	258.57	110.45
347.83	17.97	372.85	234.34	266.43	94.44	375.1
44.76	404.27	109.69	151.5	209.28	232.67	349.25
711.03	186.31	93.74	427.95	80.91	162.9	66.78
96.65	55.95	62.44	448.44	225.04	126.54	344.39
209.14	248.64	72.96	179.14	124.67	187.64	204.46
134.23	287.32	196.87	326.98	229.5	84.51	115.94
61.74	131.36	145.16	180.38	224.46	399.68	122.23
109.73	231.02	112.26	513.79	187.58	391.57	107.66
85.98	137.99	95.39	366.45	178.12	414.32	148.74
131.27	157.91	147.19	146.81	129.24	235.15	97.66
199.51	141.65	276.57	252.52	634.78	184.53	92.43
138.72	70.93	345.23	190.97	139.06	173.44	98.86
448.48	167.24	141.56	257.36	175.32	76.39	54.98
452.97	50.06	48.22	207.11	51.32	57.98	220.03
86.08	151.67	293.64	61.43	145.16	192.76	63.44
144.84	196.9	107.7	195.95	202.38	370.8	118.79
147.53	147.06	108.86	178.86	313.02	62.72	313.43
101.14	718.99	63.83	72.61	182.04	132.15	101.43
286.32	546.57	240.68	305.32	141.1	107.32	23.63
55.74	47.51	348.92	394.31	463.39	148.16	103.72
97.66	125.46	440.99	335.61	820.68	83.78	81.65
57.82	350.76	150.12	610.74	345.35	158.18	177.46
81.15	616.38	121.88	121.34	114.59	462.21	174.16
92.81	245.74	312.46	140.57	837.83	66.22	107.86
35.87	314.33	517.17	306.51	580.22	396.52	96.86
127.19	199.12	458.73	98.1	86.92	164.99	163.29
167.87	88.51	121.45	189.77	126.18	294.32	591.6
77.83	260.6	140.27	216.62	212.02	327.56	200.29
238.71	105.17	182.12	314.05	816.12	118.8	268.71
129.38	236.01	793.43	195.81	942.86	274.73	99.69
211.88	153.14	346.94	145.43	385.22	390.12	112.34
213.91	180.41	601.78	541.69	574.57	261.99	348.27
138.75	68.42	120.16	709.85	311.89	122.92	224.3
76.79	173.07	212.62	89.29	152.74	266.63	172.1
65.82	223.57	123.92	301.17	114.87	258.62	170.59
180.95	103.13	257.3	156.16	99.54	162.1	144.57
157.14	312.71	462.11	113.98	233.75	888.99	241.66
219.82	567.52	173.36	67.36	187.73	150.99	190.58
143.93	172.48	185.89	108.86	477.41	219.55	94.18
133.48	460.95	150.24	235.94	531.56	533.56	468.9
138.14	221.99	127.83	128.26	158.21	213.65	344.2
170.27	112.47	192.67	158.24	89.25	110.33	317.93
216.07	151.93	164.91	86.94	339.13	979.72	415.94
76.3	92.67	134.5	177.71	109.42	122.6	165.74
238.32	153.54	584	106.22	942.98	209.87	168.53
518.82	385.52	329.84	242.25	363.52	127.15	138.38
199.06	45.53	313.68	191.77	178.13	107.2	107.14
124.33	349.96	343.39	71.71	119.82	153.33	151.87
264.37	79.31	104.3	228.91	108.63	341.48	339.81
190.4	286.97	178.7	191.89	392.67	154.16	146.6
60.96	359.54	171.68	96.18	78.72	597.12	65.26
122.44	231.19	272.77	214.75	376.53	156.95	421.32
122.47	291.69	315.19	156.59	148.82	65.34	104.48
91.91	127.46	130.68	206.72	465.27	85.59	246.82
144.57	470.42	166	162.64	277.71	103.86	57.21
186.73	181.68	140.46	163.68	271.15	69.18	174.59
267.29	193.16	161.42	109.87	544.85	110.06	243.84
126.07	326.14	230.66	154.43	51.78	199.68	261.31
92.68	208.61	339.72	366.42	178.72	240.21	204.5
123.97		237.13	173.33	1433.36	302.61	122.8
125.08		145.75	65.18	103.47	84.28	106.89
116.17		156.84	126.44	305.12	90.68	109.76
126.15		133.65	382.04	134.66	104.37	104.62
213.59		385.09	980.9	139.26	406.23	68.03
196.82		467.59	501.36	60.55	118.62	305.91
381.44		173.32	510.5	38.23	276.29	153.5
151.55		265.02	179.84	459.61	205.04	198.48
129.38		137.39	93.53	131.75	108.38	136.6
37.98		347.55	574	125.47	95.02	181.09
339.42		114.63	343.03	145.36	84.05	239.16
254.36		151.03	93.28	177.72	367.09	272.12
80.43		589.42	325.98	515.81	206.85	206.64
113.17		368.01	264.58	277.28	108.68	104.8
163.61		398.64	757.01	159.23	91.96	461.6
277.58		120.75	125.86	198.39	112.61	99.51
341.43		172.17	476.56	355.66	220.61	74.82
103.6		81.41	539.51	248.9	89.34	121.54
122.37		145.85	496.36	76.6	320.28	199.37
194.16		256.78	473.73	535.91	124.65	290.31
126.59		149.76	443.5	620.94	242.93	153.08
162.4		270.65	130.07	140.89	343.28	79.38
92.52		344	104.85	814.84	104.69	149.64
105.3		47.35	218.03	339.97	249.74	269.79
239.27		137.64	149.57	151.86	111.35	76.33
285.37		285.9	173.98	274.6	148.22	146.78
343.33		117.18	77.75	175.94	229.75	240.82
96.04		96.41	130.62	266.12	169.44	341.87
62.57		414.51	367.51	1409.95	160.88	540.52
209.43		341.65	326.63	136.75	322.3	355.13
166.33		507.65	251.43		153.14	198.4
283.22		159.91	963.92		189.44	309.94
138.17		128.82	373.24		175.97	219.13
282.49		899.62	145.81		65.76	142.08
79.88		431.54	339.94		66.73	275.27
185.3		204.93	302.25		123.97	146.39
176.92		869.32			302.43	144.53
438.27		149.13			144.56	133.31
95.37		789.13			56.48	152.94
231.3		172.79			154.9	235.77
208.99		613.07			148.53	187.84
937.96		104.64			289.68	236.51
730.31		212.99			386.68	226.04
210.29		122.52			135.56	89.09
248.95		265.13			94.9	93.18
244.06		466.56			108.5	355.05
38.55		110.99			144.47	131.18
456.93		188.76			157.18	194.93
229.89		185.74			233.08	234.03
176.88		202.97			264.73	439.55
125.68		120.58			121.04	128.73
141.02		197.75			286.03	353.55
67.62		162.02			158.97	263.88
		153.24			171.43	361.71
					99.59	526.14
					395.47	216.64
					259.14	159.34
					281.24	514.48
					122.85
					130.45
					122.61
					123.28
					441.65
					293
					94.1
					322.76
					151.05
					145.83
					102.96
					199.3
					238.61
					167.7
					129.06
					116.77
					214.69
					186.23
					167.85
					502.72
					46.1
					55.94
					46.76
					79.66
					88.56
					61.75
					124.47
					174.9
					198.8
					101.7
					124.02
					267.18
					183.26
					281.89
					83.9
					471.18
					55.3
					317.46
					240.71
					93.52
					85.29
					156.1
					253.08
					286.56
					706.93
					143.35
					210.82
					101.11
					120.94
					350.17
					201.84
					328.36
					187.05
					231.46
					171.44
					141.76
					151.63
					573.74
					234.08
					88.04
					113.31
					137.67
					159.79
					84.14
					112.84
					320.26
					576.47
