# Supplementary material for: Promoting axon regeneration by inhibiting RNA N6-methyladenosine demethylase ALKBH5
Source: eLife. 2023 Aug 3;12:e85309. doi: 10.7554/eLife.85309 (PMC10400074; doi:10.7554/eLife.85309)
Supplement: Figure 4—source data 2. [file elife-85309-fig4-data2.xlsx]

## Sheet: Figure 4- figure supplement 1
	siControl			siRNA1			siRNA2
Aldh3b1	0.885928	1.09922	1.02687	0.363812	0.523648	0.398698	0.351766	0.307455	0.225771
Lpin2	0.98954	1.02229	0.988542	0.463089	0.374433	0.342398	0.324843	0.316261	0.336423
Galns	1.17446	0.995372	0.855411	0.390723	0.371092	0.417913	0.439862	0.542292	0.506441
