# Supplementary material for: Promoting axon regeneration by inhibiting RNA N6-methyladenosine demethylase ALKBH5
Source: eLife. 2023 Aug 3;12:e85309. doi: 10.7554/eLife.85309 (PMC10400074; doi:10.7554/eLife.85309)
Supplement: Figure 5—source data 1. [file elife-85309-fig5-data1.xlsx]

## Sheet: Figure 5A-B
	anti-IgG			anti-m6A
NC	0.013321	0.01275	0.012166	3.08432	2.61472	2.82079
KD1	0.045707	0.03938	0.034103	5.04851	4.68045	5.37866
KD2	0.027043	0.022283	0.029899	5.53439	4.53914	5.39214
	anti-IgG			anti-m6A
EGFP	0.044091	0.037092	0.042454	2.53427	3.12603	2.56369
wt-ALKBH5	0.020544	0.02845	0.039197	1.27365	1.87618	1.43221
mut-ALKBH5	0.019347	0.029712	0.031176	3.26041	2.84906	3.53501

## Sheet: Figure 5C
	NC			KD1			KD2
Lpin2	0.957273	0.979944	1.06601	0.661982	0.504984	0.708452	0.564244	0.487612	0.51363

## Sheet: Figure 5D
	Control			wt-ALKBH5			mut-ALKBH5
Lpin2	0.981712	0.9611	1.05986	1.3455	1.41318	1.50548	1.03475	1.08004	1.08395

## Sheet: Figure 5F
	NC			KD1			KD2
LPIN2	0.922208	0.885293	1.1925	0.46036	0.663112	0.582931	0.683803	0.384841	0.328756
ALKBH5	0.932745	0.87769	1.18956	0.563477	0.534411	0.549995	0.551777	0.48242	0.510769

## Sheet: Figure 5H
	Control			wt-Alkbh5			mut-Alkbh5
LPIN2	1.04625	0.830527	1.12323	1.61617	1.3039	1.35342	0.934673	1.00282	1.18484
ALKBH5	0.964172	1.08726	0.948563	5.19626	3.74554	3.67567	2.83954	2.61228	2.39865

## Sheet: Figure 5I
	NC			KD1			KD2
0	0.914044	0.935691	1.16923	1.19667	0.911279	0.917008	0.884862	0.990963	1.14043
2	0.411253	0.518484	0.533512	0.201622	0.239599	0.239987	0.318252	0.244046	0.100187
4	0.508097	0.43377	0.313115	0.223197	0.105911	0.250772	0.101052	0.143296	0.250817
8	0.414827	0.284003	0.322684	0.219971	0.209926	0.125786	0.189677	0.145063	0.170496

## Sheet: Figure 5J
	Control			wt-ALKBH5			mut-ALKBH5
0	0.981712	0.9611	1.05986	0.925973	1.11716	1.19013	1.16775	0.99002	0.864981
2	0.435129	0.494962	0.587289	0.826056	0.732791	0.838139	0.399588	0.589783	0.469571
4	0.430723	0.393456	0.422859	0.587451	0.553284	0.67879	0.489879	0.498042	0.507259
8	0.382952	0.362183	0.344093	0.415161	0.405139	0.425632	0.278281	0.361281	0.414175

## Sheet: Figure 5K
	NC			KD1			KD2
Lpin2	0.988059	0.960324	1.0539	1.74472	1.66956	1.52486	1.7411	1.94923	1.99537
	NC	KD1	KD2
14	0.026235	0.009029	0.00408
15	0.031396	0.003261	0.020941
16	0.061189	0.015814	0.032824
17	0.097133	0.048049	0.077049
18	0.177409	0.090948	0.113332
19	0.330659	0.204878	0.194995
20	0.587866	0.387878	0.352151
21	1.04762	0.725539	0.621487
22	1.75345	1.30015	1.07966
23	2.7097	2.1647	1.78139
24	3.69372	3.17601	2.7203
25	4.45555	4.08036	3.64517
26	4.87765	4.62199	4.3018
27	5.05337	4.89522	4.63623
28	5.09924	5.00212	4.81256
29	5.13204	5.07639	4.83469
30	5.13754	5.04907	4.8681

## Sheet: Figure 5L
	Control			wt-ALKBH5			mut-ALKBH5
Lpin2	1.03799	0.949925	1.01418	0.27832	0.277101	0.289154	1.03845	0.847978	1.04289
	Control	wt-ALKBH5	mut-ALKBH5
14	0.018382	0.038044	0.01738
15	0.026338	0.083967	0.040097
16	0.047902	0.155168	0.070191
17	0.100602	0.281442	0.111244
18	0.166507	0.489091	0.195475
19	0.322816	0.864775	0.349042
20	0.564472	1.44884	0.618621
21	0.988573	2.2606	1.06881
22	1.65216	3.1893	1.81298
23	2.53426	3.96585	2.74441
24	3.43043	4.49053	3.71384
25	4.17002	4.7638	4.45821
26	4.64581	4.86499	4.85525
27	4.8415	4.97578	5.07801
28	4.96403	5.00914	5.19038
29	4.98786	5.03433	5.21761
30	5.03098	5.05699	5.25162

## Sheet: Figure 5N
	NC				KD1				KD2				EGFP				wt-ALKBH5				mut-ALKBH5
WT	1.04821	1.12356	0.912558	0.943271	0.644969	0.751536	0.831264	0.869035	0.605127	0.750098	0.777596	0.73663	0.979368	1.13588	0.973359	0.90335	1.37244	1.35193	1.30643	1.45972	0.967628	1.16901	1.20934	1.05093
MUT	1.05859	1.01353	1.00704	0.92964	0.874757	1.1662	1.1135	0.920781	0.917165	0.935392	1.05496	0.92187	1.13806	1.09149	0.951653	0.866302	0.989026	0.971749	0.921874	1.07937	1.0181	0.952221	0.956475	0.872365
