# Supplementary material for: Promoting axon regeneration by inhibiting RNA N6-methyladenosine demethylase ALKBH5
Source: eLife. 2023 Aug 3;12:e85309. doi: 10.7554/eLife.85309 (PMC10400074; doi:10.7554/eLife.85309)
Supplement: Figure 5—source data 2. [file elife-85309-fig5-data2.xlsx]

## Sheet: Figure 5- figure supplement 1A
	0D IgG			0D m6A			3D IgG			3D m6A
Lpin2-Pre	0.300477	0.236752	0.179795	4.04335	2.3279	3.74629	0.495167	0.370086	0.624187	4.73473	2.93106	4.2355

## Sheet: Figure 5- figure supplement 1B
	NC			KD1			KD2
Lpin2-Pre	1.11137	1.07095	0.840183	1.21455	1.03731	1.08262	1.07881	1.00483	0.804973

## Sheet: Figure 5- figure supplement 1C
	Control			wt-ALKBH5			mut-ALKBH5
Lpin2-Pre	1.04912	1.121	0.850293	1.04015	0.892612	1.05762	1.01571	1.12144	0.992664

## Sheet: Figure 5- figure supplement D
	NC			KD1			KD2
0	1.07422	0.872008	1.06754	1.25765	0.770196	1.03238	1.10393	1.21991	0.742564
2	0.188848	0.201902	0.287536	0.23459	0.106609	0.169283	0.148301	0.219875	0.128515
4	0.203559	0.11087	0.128966	0.177414	0.129428	0.173823	0.092201	0.146745	0.161773
8	0.181018	0.084565	0.11644	0.125958	0.076898	0.175725	0.094286	0.161844	0.089972

## Sheet: Figure 5- figure supplement 1E
Control			wt-ALKBH5			mut-ALKBH5
1.04912	1.121	0.850293	1.04649	0.898048	1.06406	1.22837	0.959007	0.848885
0.416066	0.22836	0.233426	0.331241	0.255887	0.271068	0.364897	0.276051	0.348817
0.161517	0.134281	0.192635	0.120643	0.199015	0.207175	0.207236	0.159573	0.269744
0.12076	0.168448	0.123959	0.116819	0.077396	0.137814	0.089946	0.188497	0.194606
