# Supplementary material for: Promoting axon regeneration by inhibiting RNA N6-methyladenosine demethylase ALKBH5
Source: eLife. 2023 Aug 3;12:e85309. doi: 10.7554/eLife.85309 (PMC10400074; doi:10.7554/eLife.85309)
Supplement: Figure 5—source data 3. [file elife-85309-fig5-data3.xlsx]

## Sheet: Figure 5-figure supplement 2A-B
Lpin2	Cytoplasm			Nucleus
NC	97.4516	97.0251	97.3683	2.54841	2.97486	2.63166
KD1	97.7024	96.1903	97.2485	2.29758	3.8097	2.75146
KD2	96.4045	97.0445	95.8859	3.59548	2.95552	4.1141
Lpin2-Pre	Cytoplasm			Nucleus
NC	1.01192	1.49656	1.52841	98.9881	98.5034	98.4716
KD1	1.59826	1.40681	1.2483	98.4017	98.5932	98.7517
KD2	1.52887	1.70481	1.76464	98.4711	98.2952	98.2354

## Sheet: Figure 5-figure supplement 2C-D
Lpin2	Cytoplasm			Nucleus
Control	93.912	95.7072	96.108	6.08805	4.29283	3.89202
wt-ALKBH5	92.9091	96.2183	95.5256	7.09092	3.78166	4.4744
mut-ALKBH5	93.6437	94.4306	90.0316	6.35628	5.56938	9.96839
Lpin2-Pre	Cytoplasm			Nucleus
Control	3.46217	3.64089	4.46028	96.5378	96.3591	95.5397
wt-ALKBH5	5.20791	2.61749	5.20577	94.7921	97.3825	94.7942
mut-ALKBH5	4.46697	4.12897	3.95659	95.533	95.871	96.0434
