# Supplementary material for: Promoting axon regeneration by inhibiting RNA N6-methyladenosine demethylase ALKBH5
Source: eLife. 2023 Aug 3;12:e85309. doi: 10.7554/eLife.85309 (PMC10400074; doi:10.7554/eLife.85309)
Supplement: Figure 6—source data 1. [file elife-85309-fig6-data1.xlsx]

## Sheet: Figure 6A
0D	1D	3D	7D
0.815488	0.484507	0.540312	0.685734
1.17347	0.581147	0.665376	0.794844
1.04499	0.446902	0.581445	0.616634

## Sheet: Figure 6C
0d	1d	3d	7d
1.1	0.81	0.22	0.44
1.04	0.87	0.36	0.35
0.86	0.57	0.46	0.31

## Sheet: Figure 6D
EGFP	LPIN2
0.93	3.6
0.99	5.16
1.07	3.35

## Sheet: Figure 6F
EGFP	LPIN2
842.8	993.12
269.45	137.76
246.24	109.76
417.01	584
250.78	314.08
588.35	115.28
180.93	791.68
435.29	55.52
357.72	113.28
313.56	325.76
257.99	80.88
244.29	819.76
176.46	106.72
127.92	275.52
107.46	511.6
198.44	834.08
411.7	56.32
188.91	363.84
311.25	114.88
658.4	154.48
614.37	194.64
320.09	171.2
269.96	149.52
81.09	368.8
557.89	267.84
496.75	51.2
405.98	63.36
105.92	186.24
102.92	139.52
609.67	344.56
169.31	610.72
224.05	191.92
900.02	938.32
285.29	663.52
429.48	72.4
132.11	106.72
392.3	345.52
252.25	263.6
462.33	67.84
375.85	120.56
115.57	119.76
255.86	77.04
181.3	309.36
401.95	296.8
325.26	313.6
229.09	94.96
632.82	69.84
175.33	177.76
118.79	579.68
484.31	501.28
596.32	135.28
165.51	200
412.88	107.2
122.86	171.76
942.01	397.44
362.28	128.64
113.59	152.24
612.19	173.2
69.01	191.6
75.72	845.28
117.98	62.72
69.04	637.36
177.22	360.16
442.72	147.12
201.77	81.12
339.7	105.36
685.28	710.16
323.45	84.8
643.11	262.4
418.92	190.24
454.14	398.72
64.53	229.04
508.91	126
54.15	223.2
134.61	51.12
915.54	53.92
489.73	242.48
398.71	366.32
470.13	72.88
314.99	129.92
342.76	103.84
211.51	127.12
563.88	514.32
134.47	204.64
56.72	129.44
354.44	74
260.18	225.52
93.88	200.56
181.48	450.64
296.94	130.72
292.11	137.28
389.68	191.68
187.57	210.4
301.12	116.64
173.08	178.32
194.98	149.92
514.74	438.08
804.79	511.52
936.31	347.84
69.88	146.64
70.99	122.08
116.01	143.6
63.44	177.2
472.57	156.24
172.29	109.04
152.91	293.92
236.7	126.16
395.23	208
154.75	698.4
239.09	206.16
650.22	63.6
629.72	101.68
52.83	357.68
245.89	234.32
623.88	53.68
280.02	115.52
353.07	83.36
169.92	257.2
425.94
140.26
521.26
109.07
475.98
227.63
863.93
207.2
252.27
239.29
201.11
363.46
207.53
239.93
94.96
511.26
346.26
107.46
148.07

## Sheet: Figure 6H
	EGFP			LPIN2
	Mean	SD		Mean	SD
	1	0		1	0
	0.85	0.09		0.75	0.07
	0.71	0.11		0.63	0.08
	0.62	0.14		0.47	0.08
	0.56	0.15		0.36	0.05
	0.5	0.13		0.24	0.06
	0.42	0.14		0.13	0.08
	0.32	0.14		0	0
	0.18	0.13		0	0
	0	0		0	0
	0	0		0	0

## Sheet: Figure 6I
EGFP	LPIN2
3.65	3.03
3.27	2.45
3.21	2.25
3.9	2.43
3.78

## Sheet: Figure 6K
EGFP	LPIN2
0	16
0	9
0	25
0	6
0	16
0	21
0	4
0	9
0	8
0	14
0	16
0	11
0	4
0	13
0	11
0	17
0	5
0	6
0	11
0	6
0	9
