# Supplementary material for: Promoting axon regeneration by inhibiting RNA N6-methyladenosine demethylase ALKBH5
Source: eLife. 2023 Aug 3;12:e85309. doi: 10.7554/eLife.85309 (PMC10400074; doi:10.7554/eLife.85309)
Supplement: Figure 6—source data 2. [file elife-85309-fig6-data2.xlsx]

## Sheet: Figure 6- figure supplement 1
	EGFP	LPIN2
	32.82	34.2
	38.54	47.98
	31.63	33.59
	39.39	30.26
	29.03
