# Supplementary material for: Promoting axon regeneration by inhibiting RNA N6-methyladenosine demethylase ALKBH5
Source: eLife. 2023 Aug 3;12:e85309. doi: 10.7554/eLife.85309 (PMC10400074; doi:10.7554/eLife.85309)
Supplement: Figure 7—source data 1. [file elife-85309-fig7-data1.xlsx]

## Sheet: Figure 7B
EGFP+NC	EGFP+KD2	KD2+LPIN2
25.63	342.08	159.28
365.35	390.8	466.24
427.88	84.64	164.72
130.28	951.84	271.68
160.81	24.72	122.08
33.52	1151.2	55.28
422.86	971.68	409.2
53.43	70.64	560.4
254.62	301.76	30.56
164.65	186.96	58.96
345.74	95.68	953.92
166.79	107.76	278.24
931.43	67.68	45.52
21.02	332.48	377.6
40.08	60.72	82.64
530.45	157.44	162.32
284.95	406.48	146.56
208.69	772.8	362.4
492.41	124.24	140.48
211.38	211.84	515.6
31.92	386.56	748.24
120.49	310.8	129.84
21.34	374	173.84
24.92	76.56	317.68
29.36	61.28	234.88
28.92	370.32	196.96
282.98	77.6	40.72
37.94	127.76	86.64
176.97	361.84	164.88
36.07	140.24	54.08
172.75	752.56	576.96
199.06	193.44	258.16
486.83	610.24	317.68
39.28	293.12	31.84
45.21	59.2	45.44
267.48	352.48	647.6
249.61	236.08	240.96
31.06	242.48	176.08
166.35	33.76	36.08
60.52	52.4	145.36
564.85	374.8	281.28
368.26	768.88	562.32
176.06	22.88	30.96
36.08	495.68	307.04
37.11	148.4	374.24
169.01	534.88	265.36
352.89	277.44	247.6
167.98	263.76	44.4
31.91	83.6	54.72
367.3	135.2	70.96
26.51	386.08	33.44
29.74	516.32	100.88
59.24	67.36	37.12
248.27	426.48	196.56
110.29	109.04	210.4
557.54	193.6	448.8
269.49	104.96	620.56
64.99	112.16	21.2
68.98	278.16	529.04
165	255.6	116.64
91.6	489.92	115.92
323.35	918.88	80.88
22.19	156.4	174.32
133.53	674.8	57.84
144.15	268.16	44.32
132.09	599.52	290.24
501.36	176	435.92
112.12	353.84	270.56
451.89	198.24	137.6
158.38	740.56	38.88
725.12	161.44	355.52
540.6	381.04	563.84
235.03	102.4	196.96
56.63	109.84	640.32
139.13	566.88	77.04
747.69	695.52	562.72
180.36	592.16	138.96
54	623.6	249.68
572.53	218.56	241.28
36.9	442	273.92
790.91	93.92	48.8
212.88	653.84	34.72
77.04	43.44	52.88
465.51	331.84	224.4
255.72	31.76	346.72
305.76	209.6	632.56
455.32	163.12	99.04
380	131.6	270.16
796.22	198.32	64.96
185.5	350.56	413.2
298.75	528.4	382.24
188.81	868.96	825.44
182.57	920.56	778.56
94.72	391.68	124.24
178.46	329.52	214.72
97.04	68.96	291.28
313.06	867.44	178.48
57.31	181.04	166.16
119.87	184.24	659.84
66.54	363.12	28.4
64.33	217.76	28.88
205.25	91.92	322.24
166.16	221.44	42.08
135.01	197.68	21.28
383.16	47.76	718.16
113.14	610.96	108.64
138.4	46.72	125.84
635.48	751.2	270.16
386.61	104.72	96.48
23.2	80.64	297.52
327.09	1100.96	916.08
500.89	75.92	158.96
484.72	204.96	197.84
108.02	138.16	267.04
311.77	144.08	354.16
213.3	262.96	168.16
90.29	48.24	62.16
74.45	93.36	33.6
417.06	190.96	351.04
116.48	135.12	94.56
154.24	353.28	473.84
483.05	40.24	403.2
20.65	35.12	124.16
36.91	170.88	445.12
235.05	480.32	88.56
164.6	458.64	25.52
150.94	301.92	132.8
74.29	442.8	32.32
422.64	92.96	322.8
51.13	550	160.4
42.88	48.08	50.08
50.47	202.64	20
23.2	189.84
219.34	58.32
445.15	211.28
70.77	283.84
489.35	101.52
505.23	375.84
63.13	34.64
41.66	653.2
868.63	339.12
773.37	361.04
20.16	157.92
574.58	99.84
98.37	282
172.49	599.44
85.34	931.28
336.26	189.68
290.44	823.04
117.16	40.32
48.7	271.28
29.37	370.4
27.86	249.04
346.82	243.92
487.06	258.72
510.72	53.84
457.52	111.52
411.25	340
184.18	269.12
104.61	308.64
64.56	342.24
696.98
34.55
322.37
239.29
300.06
231.48
316.51
122.01
46.54
73.98
284.54
191.45
613.58
85.19
25.39
33.77
33.24
290.14
29.62
110.48
361.77
41.85

## Sheet: Figure 7D
	EGFP+NC			EGFP+KD2			KD2+LPIN2
	Mean	SD		Mean	SD		Mean	SD
	1	0		1	0		1	0
	0.85	0.13		0.9	0.07		0.86	0.09
	0.71	0.12		0.81	0.11		0.75	0.1
	0.62	0.1		0.74	0.08		0.68	0.13
	0.51	0.12		0.68	0.1		0.6	0.11
	0.39	0.1		0.58	0.07		0.45	0.09
	0.3	0.1		0.51	0.1		0.32	0.07
	0.18	0.06		0.41	0.11		0.25	0.07
	0.1	0.05		0.31	0.1		0.17	0.08
	0.02	0.04		0.24	0.11		0.1	0.06
	0	0		0.15	0.07		0.06	0.05
	0	0		0.08	0.05		0.02	0.03
	0	0		0.03	0.03		0	0
	0	0		0.01	0.02		0	0
	0	0		0	0		0	0

## Sheet: Figure 7E
EGFP+NC	EGFP+KD2	KD2+LPIN2
3.72494	5.14672	4.3487
3.17768	4.26898	3.68736
3.69895	4.9971	3.25292
2.96583	5.00309	4.18004
3.10706
