# Supplementary material for: Promoting axon regeneration by inhibiting RNA N6-methyladenosine demethylase ALKBH5
Source: eLife. 2023 Aug 3;12:e85309. doi: 10.7554/eLife.85309 (PMC10400074; doi:10.7554/eLife.85309)
Supplement: Figure 8—source data 1. [file elife-85309-fig8-data1.xlsx]

## Sheet: Figure 8B
Intact	3d
0.96	1.21
1.2	0.91
0.9	1.11
0.93	1.23
0.95	0.91
1.05	0.98

## Sheet: Figure 8E
shControl	shAlkbh5
18.41	33.02
28.25	30.79
20.32	42.54
16.19	31.43
23.17	36.19
19.37	23.81

## Sheet: Figure 8G
	shControl						shAlkbh5
200	81	117	153	72	189	63	558	369	566	306	252	495
500	27	18	45	18	72	0	306	234	333	117	171	324
750	9	0	0	0	27	0	135	81	54	63	99	63
1000	9	0	0	0	18	0	54	36	36	27	27	36
1500	9	0	0	0	0	0	9	9	27	18	0	9
2000	0	0	0	0	0	0	0	0	0	0	0	0
