# Supplementary material for: Promoting axon regeneration by inhibiting RNA N6-methyladenosine demethylase ALKBH5
Source: eLife. 2023 Aug 3;12:e85309. doi: 10.7554/eLife.85309 (PMC10400074; doi:10.7554/eLife.85309)
Supplement: Figure 8—source data 2. [file elife-85309-fig8-data2.xlsx]

## Sheet: Figure 8- figure supplement 1
Percentage of EGFP-positive RGC with Tuj1（%）
59.05
81.27
69.21
77.78
66.98
